1           **Neuronal tracing and analysis by multispectral tracing in densely labeled**  
2                                                           **mouse brain**

3  
4   **Authors**

5 Douglas H. Roossien<sup>1</sup>, John M. Webb<sup>2,8</sup>, Benjamin V. Sadis<sup>1,8</sup>, Yan Yan<sup>1,8</sup>, Lia Y. Min<sup>1,3,4</sup>, Aslan  
6 S. Dizaji<sup>1</sup>, Robert S. Huth<sup>1</sup>, Johanna S. Stecher<sup>1</sup>, Luke J. Bogart<sup>5</sup>, Cristina Mazuski<sup>2</sup>, Jeff W.  
7 Lichtman<sup>6,7</sup>, Takao K. Hensch<sup>5,6,7</sup>, Erik D. Herzog<sup>2</sup>, Dawen Cai<sup>1,\*</sup>

8   **Affiliations**

9   <sup>1</sup>Department of Cell and Developmental Biology, University of Michigan Medical School, Ann  
10 Arbor, MI, USA

11   <sup>2</sup>Department of Biology, Washington University in St. Louis, St. Louis, MO, USA

12   <sup>3</sup>Life Sciences Institute, University of Michigan, Ann Arbor, MI, USA

13   <sup>4</sup>School of Art and Design, University of Michigan, Ann Arbor, MI, USA

14   <sup>5</sup>Department of Neurology, Boston Children's Hospital, Harvard Medical School, Boston, MA,  
15 USA

16   <sup>6</sup>Department of Molecular and Cellular Biology, Harvard University, Cambridge, MA, USA

17   <sup>7</sup>Center for Brain Science, Harvard University, Cambridge, MA, USA

18   <sup>8</sup>These authors contributed equally to this work.

19   \*Correspondence should be addressed to D.C (dwcai@umich.edu)

20 **Abstract**

21 Accurate and complete neuronal wiring diagrams are necessary for understanding brain function  
22 at many scales from long-range interregional projections to microcircuits. Traditionally, light  
23 microscopy-based anatomical reconstructions use monochromatic labeling and therefore  
24 necessitate sparse labeling to eliminate tracing ambiguity between intermingled neurons.  
25 Consequently, our knowledge of neuronal morphology has largely been based on averaged  
26 estimations across many samples. Recently developed second-generation Brainbow tools  
27 promise to circumvent this limitation by revealing fine anatomical details of many  
28 unambiguously identifiable neurons in densely labeled samples. Yet, a means to quantify and  
29 analyze the information is currently lacking. Therefore, we developed nTracer, an ImageJ plug-  
30 in capable of rapidly and accurately reconstructing whole-cell morphology of large neuronal  
31 populations in densely labeled brains.

32

33

34

35

36

37

38

39

40

41

42

43

44

45

46

47

48

## 49 **Introduction**

50         Despite neural circuits being of wide interest to neuroscientists, there are few technologies  
51 that fully dissect these complex networks. Automated serial electron microscopy techniques are  
52 one means of obtaining the full details of networks, but the volumes that can be studied are limited  
53 by the throughput or other physical constraints of the techniques being employed, therefore  
54 currently limited to smaller vertebrates<sup>1</sup>. While light microscopy is easy to implement and allows  
55 for imaging large volumes of genetically labeled neurons, the inability to distinguish processes  
56 between labeled neurons is a considerable limitation, such that reliable anatomical neuronal  
57 reconstruction results can only be obtained from samples in which labeled neurons occupy unique  
58 volumes with little to no overlap, or, alternatively, singly labeled neurons<sup>2-7</sup>. Generating such  
59 samples can be cumbersome and increases the number of samples needed to obtain statistically  
60 relevant results. One approach to overcome the limitation of light microscopy is to differentially  
61 label neighboring neurons with distinct colors. Brainbow does so by expressing random ratios of  
62 three or more fluorescent proteins (FPs) through Cre/Lox recombination in specific populations of  
63 neurons within a single brain<sup>8,9</sup>. These unique colors make identifying multiple neurons in a  
64 densely-labeled sample possible. In addition, because FPs from second generation Brainbow  
65 reagents are membrane bound and compatible with immunofluorescence amplification they allow  
66 visualization of fine morphological details such as dendritic spines and axonal boutons. In turn this  
67 permits identification of putative synaptic locations and can uncover anatomical constraints on  
68 neuronal circuitry. However, a lack of tools for quantitative analysis has limited Brainbow  
69 application.

70         Currently, popular commercial software such as NeuroLucida and iMaris allow either  
71 manual tracing or user-guided tracing algorithms, but none handle multispectral images<sup>6</sup>. We thus  
72 wrote nTracer, a java-based program to facilitate post-acquisition processing and user-guided  
73 semi-automated tracing of Brainbow multispectral images. We then trace a variety of different  
74 neuronal subtypes including cholinergic neurons in the striatum, granule cells in the dentate gyrus,  
75 vasoactive intestinal polypeptide (VIP) expressing neurons in the suprachiasmatic nucleus and  
76 parvalbumin (PV) expressing basket cells in the hippocampus and visual cortex. We found tracing  
77 results with nTracer can be generated at an average rate of a few hours per neuron. Together this  
78 suggests nTracer produces rapid and accurate tracing of densely labeled Brainbow samples.  
79 Overall, nTracer is an important tool that will allow neuroscience researchers to analyze

80 morphology and anatomy of large populations of neurons within single samples using the light  
81 microscope.

82

## 83 **Methods**

### 84 **Stereotaxic injection**

85 The two Brainbow AAV (AAV9.hEF1a.lox.TagBFP.lox.eYFP.lox.WPRE.hGH-InvBYF and  
86 AAV9.hEF1a.lox.mCherry.lox.mTFP1.lox.WPRE.hGH-InvCheTF) were obtained from the  
87 UPenn Vector Core and mixed to equal titer ( $8 \times 10^{12}$ ). All surgeries were performed in accordance  
88 with the institutional animal guidelines and approvals of the University of Michigan, Harvard  
89 University, University of Washington at St. Louis and the Massachusetts Institute of Technology.  
90 Mice were anesthetized with either a mixture of ketamine (90mg/kg) and xylazine (9mg/kg) or  
91 Avertin (250mg/kg) or continuously delivered isoflurane and mounted on a stereotaxic frame (WPI  
92 #502600). Craniotomies were performed using a small dental drill and injections were performed  
93 using a 30 gauge stainless steel needle inserted directly through the dura<sup>10</sup>.

94 Final Brainbow virus volume ( $\mu\text{L}$ ) x titers (in GC/mL) and stereotaxic coordinates (in mm  
95 from Bregma/dura AP, ML, DV) used in this study are as follows: ChAT-Cre (Chat<sup>tm2(cre)Lowl</sup>  
96 Jackson Laboratory No 006410; Rossi et al 2011 – Cell Metab 13(2):195-204)  $1\mu\text{L} \times 8 \times 10^{11}$ , (+1.1,  
97 -2.0, -3.4); POMC-Cre (hypothalamus) (Tg(Pomc1-cre)<sup>16Lowl</sup> Jackson Laboratory No 005965;  
98 Balthasar et al 2004 – Neuron 42(6):983-91)  $1\mu\text{L} \times 1 \times 10^{12}$ , (-2.2, -0.25, -5.4); POMC-Cre (dentate  
99 gyrus)  $1\mu\text{L} \times 1.6 \times 10^{12}$ , (-2.0, -1.6, -2.0); PV-Cre (V1) (Pvalb<sup>tm1(cre)Arbr</sup> Jackson Laboratory No  
100 008069; Hippenmeyer et al 2005 – PLoS Biol 3(5):e159)  $1\mu\text{L} \times 3 \times 10^{12}$  (-3.0,  $\pm 2.0$ , -0.4), PV-Cre  
101 (CA1)  $1\mu\text{L} \times 8 \times 10^{11}$ , (-2.0, -1.8, -1.6); VIP-Cre (SCN) (Vip<sup>tm1(cre)Zjh/J</sup> Jackson Laboratory No  
102 010908; Taniguchi et al 2011 Neuron 71:995-1013)  $1\mu\text{L} \times 1 \times 10^{12}$  or  $2.5 \times 10^{11}$ , (+0.4, -0.2, -5.5);  
103 Wildtype CD1 (CA2) AAV.Brainbow  $1\mu\text{L} \times 1.6 \times 10^{12}$  + AAV.CaMKII-Cre  $1 \times 10^{11}$  (-1.1, -1.0,  
104 -1.9). At least 3-4 weeks after injection, mice were perfused under heavy anesthesia with cold PBS  
105 followed by cold 4% paraformaldehyde (PFA). Brains are dissected immediately following  
106 perfusion and post-fixed in 4% PFA at 4°C with gentle shaking for 24 hours.

### 107 **Immunohistology**

108 We chose non-cross-reactive primary antibodies raised from 4 distinct animal species to  
109 specifically recognize the 4 FPs expressed by Brainbow AAV<sup>9</sup>: rat anti-mTFP1, chicken anti-

110 EGFP, rabbit anti-mCherry, and Guinea Pig anti-mKate2 (available from Kerafast, Boston MA).  
111 The mouse anti-GAD65 primary was obtained from the Developmental Studies Hybridoma Bank  
112 (Gad-6) and used at 1:500 dilution. The mouse anti-PV antibody was obtained from Swant (#235)  
113 and used at a 1:500 dilution. Four non-cross-reactive secondary antibodies, conjugated with  
114 spectrally well-separated fluorophores, were chosen for the Brainbow primaries to allow optimal  
115 recording of enhanced fluorescence in each spectral channel throughout the brain sections: anti-  
116 Rat Alexa594 (Life Technologies #A21209), anti-Chicken Alexa488 Jackson ImmunoResearch  
117 Inc #703-545-155), anti-Rabbit Alexa546 (Life Technologies #A10040), and anti-Guinea Pig  
118 Alexa647 (Jackson ImmunoResearch Inc #706-605-148). The GAD65 and PV stains were  
119 visualized with anti-mouse 405.

120 Sections were first blocked and permeabilized in StartingBlock-PBS (ThermoFisher) with  
121 0.5% Triton X-100 for 2-4 h at room temperature (RT) with gentle shaking. After wash, sections  
122 were incubated in all four primary antibodies each with a dilution of 1:500 in PBS with 0.25%  
123 Triton X-100 (PBST) and 0.2% sodium azide for 7-10 days at 4°C with gentle shaking. Primary  
124 antibodies were washed out of sections with three changes of 0.25% PBST for 1 hr each at RT.  
125 Secondary antibodies were mixed and diluted to a final concentration of ~3-4 ug/mL in 0.25%  
126 PBST with 0.2% sodium azide and added to sections for 3-5 days at 4°C with gentle shaking. After  
127 secondary incubation, two washes in 0.25% PBST for 2 h each followed by a final 2 h wash in  
128 PBS were performed. Sections were either mounted in Vectashield (Vector Labs #H-1000) or  
129 treated with a gradient of fructose solution up to a final concentration of 70% (w/w) for refractive  
130 index matching<sup>11</sup>.

### 131 **Imaging**

132 Sections were imaged on a Zeiss LSM 780. Optimal separation of fluorophores was  
133 achieved using a 488nm laser for Alexa488, a 543nm laser for Alexa546, and a 633nm laser for  
134 both Alexa594 and Alexa647 together with a fixed 488/543/647 dichroic mirror. Alexa488,  
135 Alexa594 and Alexa647 were imaged simultaneously and fluorescence was collected in 3 separate  
136 channels. Alexa546 was imaged in a subsequent scan with fluorescence collected in a 4<sup>th</sup> channel.  
137 Objectives were either 20x W Plan APOCHROMAT NA 1.0 water or 40x C Plan  
138 APOCHROMAT NA 1.3 oil objective. While these settings are optimized for spectral separation,  
139 due consideration has also been given to scan time. For example, better spectral separation could

140 be obtained by imaging Alexa594 with a 594 laser on a separate track. However, this would  
141 significantly increase scan time due not only to the need for an additional independent scan, but  
142 also for the need to switch the dichroic between twice for each frame. The setting we used here  
143 was much faster, but results in significant Alexa594 emission being collected in channel 3 as well  
144 as channel 2. Therefore, linear unmixing was performed to separate these two fluorescent  
145 emissions<sup>12</sup>. The laser intensity correction in depth function was used in the Zen software was used  
146 to compensate for light scattering and photobleaching.

147

## 148 **Results**

### 149 **Development of post-acquisition processing functions**

150 Reliable tracing of Brainbow labeled neurons depends on obtaining high contrast and  
151 chromatic error-free 3D images. In other words, image stacks need to contain neurons labeled in  
152 distinct and consistent color in three dimensions. Here we define color (or color signature) as the  
153 composite of intensity values from each channel for every given pixel. For example, a specific  
154 neuron in 8-bit may have a color signature of Ch1:156, Ch2:005, Ch3:255, Ch4:073. In biological  
155 terms this amounts to the ratio of FP expression in each neuron. Due to the scattering nature of the  
156 brain and the inherent optical aberrations of confocal microscopy, however, Brainbow images  
157 often decrease in quality and contain color defects when imaging deep into the tissue. We therefore  
158 first developed post-acquisition processing functions in nTracer that correct for these color defects  
159 and facilitate analysis of neuronal networks through >100 $\mu$ m thick tissue sections. These have  
160 been assembled into one convenient ImageJ User Interface called AlignMaster included in the  
161 nTracer software package. Figure 1 illustrates an optimized general workflow for Brainbow  
162 labeling with second-generation Brainbow reagents<sup>9</sup>, imaging, post-acquisition processing and  
163 neuronal tracing (**Fig. 1**).

164 There are two major sources of color defects when imaging Brainbow samples. The first is  
165 due to absorption, scattering and photobleaching, which causes a gradual decrease in fluorescence  
166 intensity when imaging deeper into the tissue. Although gradually increasing excitation power  
167 and/or detection gain can partially compensate this intensity drop, it becomes practically  
168 impossible to maintain constant intensity throughout the image stack. Compounding this is the fact  
169 that the intensities of each FP will decrease at different rates/amounts, resulting in inconsistencies  
170 in color signature at different z-positions (**Suppl. Fig. 1a**). To address these concerns, we added a

171 histogram matching correction to nTracer to normalize signal intensity while maintaining the  
172 intensity ratios between channels. The user is asked to select a reference image slice to which  
173 nTracer matches the histogram (see below) of each slice in the image stack. While the reference  
174 slice can be chosen from any channel or focal plane, the optimal reference will contain an evenly  
175 distributed histogram with minimal pixel values greater than 95% of the maximum bin (**Suppl.**  
176 **Fig. 1c**). This ensures that FP intensity remains constant in any depth of the 3D stack while  
177 minimizing amplification of background noise (**Suppl. Fig. 1c**). The reference image's cumulative  
178 probability distribution function  $CDF_{ref}()$  of its histogram  $H_{ref}()$  is calculated. For each target image  
179 slice in all channels of the whole 3D stack, a new histogram  $H_{tar}()$  is applied, which satisfies the  
180 condition that for each gray scale level  $G_{ref}$  a  $G_{tar}$  is determined to satisfy  $CDF_{ref}(G_{ref}) =$   
181  $CDF_{tar}(G_{tar})$ . After intensity equalization, we found the histogram of all image slices to be similar  
182 to that of the reference image.

183         The second source of color defects results from imperfect optical alignments and chromatic  
184 aberrations in the microscope system. Such defects cause spatial misalignment between spectral  
185 channels that creates inconsistent color along the edge of many neuronal processes (**Suppl. Fig.**  
186 **1b**). We also corrected for this in the nTracer package, by designing a channel registration function.  
187 In brief, the user makes a point selection on the image where a neuronal feature appears in all  
188 spectral channels; and then nTracer determines the translational shifts that correspond to the  
189 greatest masked-intensity correlations between each channel and the selected channel. Eliminating  
190 highly correlated background pixels, the masking function increase the sensitivity of correlating  
191 the fluorescent neurons. This correction is particularly useful for microscope systems with large  
192 chromatic aberration, whose severe par-focal problem normally causes large shifts between short  
193 and long wavelength channels (**Suppl. Fig. 1d**).

194         In addition to these corrections, nTracer provides a 3D stitching function that allows rapid  
195 merging from overlapping Brainbow image tiles to create a single image stack that covers a large  
196 tissue volume. While the size of datasets can vary dramatically depending on the biological  
197 application, the size of the datasets used throughout this report varies from hundreds of megabytes  
198 to hundreds of gigabytes.

199         Both the intensity correction and channel alignment can be done in batch mode on all  
200 images (e.g. all stacks if a multi-tile image was taken for stitching) in a selected folder. For  
201 stitching, easily identifiable features in overlapping regions are selected by the user and local area



202 is used to calculate the translation parameters needed to stitch the tiles together. To minimize  
203 processing time, which can be considerable with larger data sets, both the alignment and stitching  
204 functions rely on a local area to perform initial translation calculations and previews to proof the  
205 result prior to applying the translation. The data sets in this study were first processed with the  
206 intensity correction, followed by channel alignment, then stitching. We found it important to do  
207 batch processing of color intensity prior to stitching to obtain uniform signal-to-noise and intensity  
208 across all tiles. Additional downstream processing steps can be performed as needed. For example,  
209 deconvolution using the Richardson-Lucy algorithm in DeconvolutionLab<sup>13</sup> was performed on the  
210 images shown in Fig. 2c.

211

### 212 **Tracing function and data structure**

213 The current bottleneck in fully automated tracing algorithms is proof reading and error  
214 correcting (refs 6-8). Because of this, combined with the lack of any ground-truth Brainbow tracing  
215 results for validation, we developed nTracer as a user-guided semi-automated tracing software  
216 which allows for “on-the-fly” editing of tracing results. Our approach was to design a system where  
217 user-defined anchor points on a neurite are joined by a rapidly generated skeletal tracing. To make  
218 this tool widely available and easy to use we configured it as an ImageJ plug-in<sup>14</sup>.

219 We incorporated two algorithms into nTracer to accurately trace neurites from specific  
220 neurons. The first prevents user error by not allowing anchor points to be assigned to different  
221 neurons, and the second prevents the skeletal trace from jumping to the wrong neuron when joining  
222 anchor points. To start a tracing, the user identifies a neuron to be traced and uses a mouse click  
223 to suggest a start point on its process and to measure the neuron’s color signature around the start  
224 point. In most cases, the mouse clicks hardly land onto the “right” spot, which results in inaccurate  
225 color sampling. nTracer solves this problem by applying a mean-shift algorithm to automatically  
226 refine the user input and settle the start point onto the center or membrane wall of the targeted  
227 neurite with high labeling intensity<sup>15</sup> (**Suppl. Fig. 2**). The end point is defined in a similar way  
228 with additional constraints set by the color signature sampled around the start point. The user can  
229 therefore avoid setting an end point onto a different neuronal process due to human visual or  
230 computer display limitations, in particular with Brainbow images composing of more than 3  
231 spectral channels (see main text and **Suppl. Fig. 3**). To generate a smooth track along the neuronal  
232 process, nTracer utilizes the A\* algorithm<sup>16</sup> to connect the two anchor points with a least-cost path,



233 similar to that implemented in “Simple Neurite Tracer”, which was designed for tracing  
234 monochromic images<sup>17</sup>. nTracer defines the A\* cost at voxel  $i$  as a weighted sum of the normalized  
235 spectral and intensity difference between the start point  $p$  and voxel point  $i$ , which can be  
236 formulated as:

$$237 \quad G_i = \alpha \times \sqrt{\sum_n \left( \frac{I_{p,n}}{\bar{I}_p} - \frac{I_{i,n}}{\bar{I}_i} \right)^2} + \beta \times \left| \frac{\bar{I}_p - \bar{I}_i}{\bar{I}_p + \bar{I}_i} \right|, \quad \text{with } \alpha + \beta = 1,$$

238 where  $n$  denotes the  $n^{\text{th}}$  spectral channel.  $\bar{I}_p$  and  $\bar{I}_i$  are the total intensities in all spectral channels  
239 at start point  $p$  and voxel point  $i$ , respectively. By constraining the pathfinding range to the voxels  
240 enclosing the two anchor points and by choosing optimized heuristic values calculated based on  
241 windowing-smoothed voxels, nTracer creates an optimal minimal path almost instantaneously,  
242 while variance thresholds ensure that any path containing large intensity or color gaps will be  
243 rejected. In addition, the tracing process with nTracer is iterative, reducing user burden by only  
244 requiring one click per trace after the initial trace on a neurite.

245 Because nTracer must record multiple neurons to reconstruct complex circuits in the same  
246 image, it uses a data structure that differs from software approaches that focus on tracing single  
247 neurons from one image at a time. nTracer utilizes the generic JTree structure of JAVA to allow  
248 flexible storage and modification of tracing points of multiple neurons in the computer memory.  
249 Three JTrees are built for each traced cell to store the tracing points of the somas, processes and  
250 spines independently (**Fig. 1d** and **Fig. 2c**). The soma tree contains parallel nodes, each of which  
251 stores soma tracing points on a Z plane. The process tree contains parallel nodes, each of which is  
252 a bifurcated branching tree that stores connected branches of an axon, or a dendrite. The soma  
253 contour or neurite branch is composed of connected tracing points, each of which is a 7-element  
254 data array containing the type of the tracing point (Soma, Dendrite, Axon, Spine etc.), x, y, z  
255 coordinates, radius at the point (0 for a soma point or for where the process radius is not  
256 determined), whether or not a synapse, and its connection status. Spines can also be traced off from  
257 a dendrite or soma point (has a type of Spine) and stored as parallel non-branching nodes in the  
258 third tree-structure database. Each spine tracing point is a 6-element data array that stores the type  
259 (Spine), x, y, z coordinates, radius at the point, and its locale information (soma or dendrite name).  
260 The tracing results (including connectivity information), raw image information and nTracer  
261 setting parameters can be saved in files of custom format and exported as line art image stacks for  
262 volume rendering (**Suppl. Fig. 4 and Video 5-10**). Tracing results of each neuron can also be

263 exported as separate files in standard SWC format<sup>18</sup> for morphology analysis and rendering with  
264 other software, such as L-measure<sup>19</sup>.

265

## 266 **Mapping projection patterns of a complete population of neurons from a single Brainbow** 267 **sample**

268 We next sought to demonstrate the utility of nTracer. We chose to focus on the vasoactive  
269 intestinal polypeptide-expressing (VIP) neurons in the hypothalamic suprachiasmatic nucleus  
270 (SCN). These neurons project dorsally to form synaptic terminals in the paraventricular and sub-  
271 paraventricular nuclei (PVN and sub-PVN, respectively<sup>20</sup>), although it is not known whether  
272 individual VIP neurons project to multiple PVN targets or send convergent inputs onto single PVN  
273 targets. We injected Brainbow AAVs into the SCN of one hemisphere of mice expressing Cre  
274 under control of the VIP promoter (VIP-Cre<sup>21</sup>). We found that injection of virus at 1:5 (~ $1 \times 10^{12}$   
275 GC/ml; n=2 brains) to 1:20 dilution (~ $2.5 \times 10^{11}$  GC/ml; n=2 brains) resulted in labeling of similar  
276 numbers of axons projecting dorsally with 1:20 producing discriminable colors and 1:5 producing  
277 saturated labeling. We therefore present results from the brains injected with the more diluted virus  
278 (**Fig. 4**). In both brains, we found many axons and a small number of cell bodies labeled in the  
279 SCN contralateral to the side of injection. We used nTracer to trace all of the individual dorsal  
280 projections in the bilateral sub-PVN and PVN, an area of more than 1.3 mm x 0.6 mm, and  
281 performed further analysis of neurites with at least one terminal in the PVN or sub-PVN (**Fig. 4b-**  
282 **c**). We found that the large majority of neurites (~75%) bifurcate only 0 to 1 times while only a  
283 few VIP neurons had processes with up to 10 branch points outside the SCN. These results indicate  
284 that individual SCN VIP neurons each target a small population of cells in the PVN or sub-PVN.

285

## 286 **Discussion**

287 Included in the nTracer package are image processing tools designed to optimize tracing  
288 including correction of intensity drifting in depth due to uneven illumination, scattering, and  
289 photobleaching; correction of channel misalignment due to hardware misalignments and optical  
290 aberrations in the microscopy system; and intensity normalization and merging of overlapping  
291 adjacent image tiles. The key advantage of nTracer is its ability to trace neurons based on color  
292 signature, making it compatible with densely labeled Brainbow samples and to fully actualize this  
293 powerful neuronal labeling technique.

294 For this study we chose mouse Cre lines and injection sites in order to label regions with a  
295 variety of gross anatomical features. For example, the hippocampus and cortex have distinct  
296 laminar cellular organization whereas the hypothalamus and striatum do not. Labeling an entire  
297 Cre+ population of neurons in a region of interest is attainable with a wide titer range of Brainbow  
298 AAVs (from  $\sim 1 \times 10^{10}$  to  $1 \times 10^{13}$  GC/ml), however higher ( $\sim 10^{13}$  GC/ml) or lower titers ( $\sim 5 \times 10^{10}$   
299 GC/ml) resulted in more neurons labeled in saturated colors (white cells) or simple colors  
300 (expressing only one species of FP), respectively. This is directly dependent on the density of the  
301 neuronal subtype in the region of interest and the strength and fidelity of the Cre driver. Therefore,  
302 a limitation to our overall approach is the need to determine injection coordinates and viral titers  
303 empirically for each sample type. However, because we rely on immunolabeling of samples our  
304 approach is compatible with other standard histological techniques. For example, cell-type specific  
305 markers can be used in combination with Brainbow staining to trace multiple cell types within a  
306 circuit or, alternatively, axonal or dendritic markers can be used to distinguish neurite type in  
307 neurons with unknown or less stereotypic morphologies.

308 Because nTracer is user-guided and not fully automated, it requires significant man-hours to  
309 trace complete data sets. While semi-automated tracing algorithms used in other software, such as  
310 NeuroLucida, do not require as much user attention to generate the tracing result, there remains a  
311 bottleneck in the need for proofing the results due to the propensity for tracing errors<sup>22,23</sup>. Since  
312 the error rate increases substantially with more neurons and greater density, eventually the effort  
313 spent on proofing and post-tracing editing outweighs the benefit gained from semi-automated  
314 tracing. With nTracer, the tracing results are displayed immediately and therefore proofing and  
315 editing is done “on-the-fly”.

316 In the samples that all VIP-neurons were labeled, we were not able to map connectivity within  
317 the SCN or to follow the projections back to the cell body due to color blending between neuronal  
318 processes that are close to each other. This is due to the optical resolution limitations of confocal  
319 microscopy. Combining Brainbow labeling with emerging super-resolution light microscopy  
320 techniques, such as Expansion Microscopy<sup>24</sup> and its variant protein-retention ExM<sup>25,26</sup>, is an  
321 exciting possibility for producing images at the spatial resolutions that are suitable to distinguish  
322 the closely positioned synapses and neuronal processes. Going forward, we expect the combination  
323 of Expansion Brainbow Microscopy and nTracer will allow full tracing of complete neurons in  
324 SCN.

325        Nonetheless, we are currently working on developing additional semi-automated and  
326 automated tracing algorithms for nTracer<sup>27</sup>. The tracing results developed with the current nTracer  
327 described here will serve as a ground-truth for their development. nTracer will also benefit from  
328 adapting the more versatile data structure of the ImageJ2 platform currently under development<sup>28</sup>.  
329  
330

331 **Figure 1. Flow chart for Brainbow labeling, imaging and tracing for neural circuit reconstruction**  
 332 **reconstruction.**

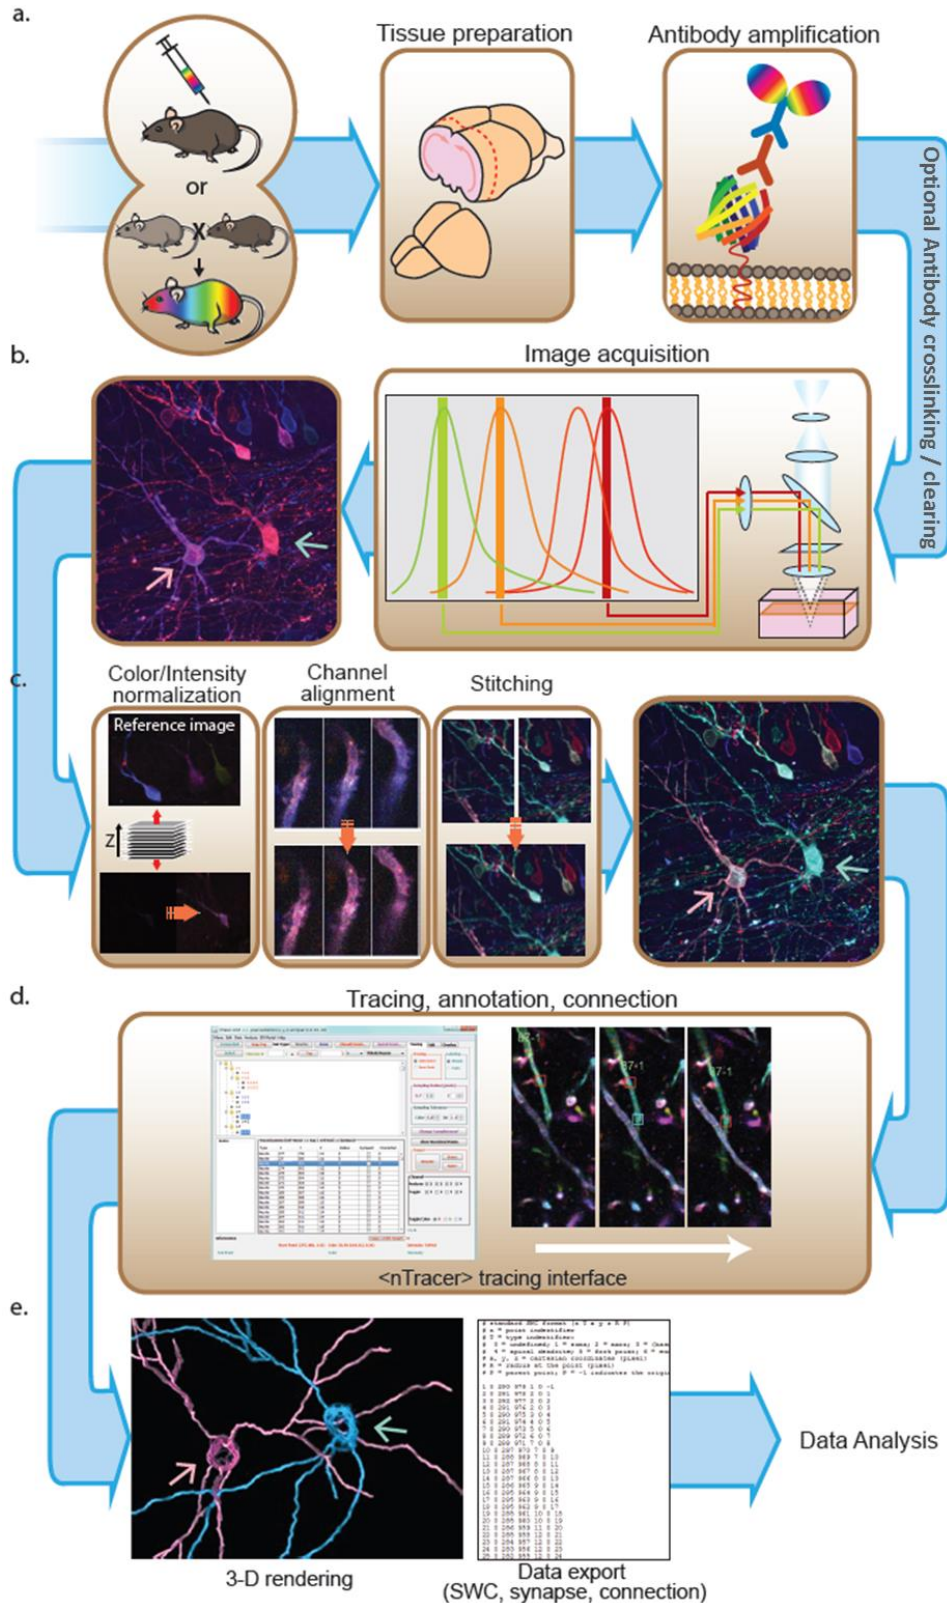

334 **Figure 1. Flow chart for Brainbow labeling, imaging and tracing for neural circuit**  
335 **reconstruction.**

336 (a) To accurately reconstruct the projections from many neuronal somata to their terminals, we  
337 used second generation Brainbow reagents, including adeno-associated viruses (Brainbow AAVs)  
338 and transgenic mouse lines (Brainbow3.x) because their farnesylated fluorescent proteins (FPs)  
339 label homogenously throughout the whole neuron including the finest dendritic spines and  
340 neuronal processes. (b) Four non-cross-reactive secondary antibodies conjugated with spectrally  
341 well-separated fluorophores allow optimal recording of enhanced fluorescence in each spectral  
342 channel throughout the brain sections. (c) To correct imaging defects in post-acquisition  
343 processing, nTracer package provides functions to automatically 1) normalize image intensity  
344 across all spectral channels and z-depths; 2) perform channel registration to correct optical  
345 misalignment and chromatic aberration of the microscopy system and 3) rapidly stitch image tiles  
346 to create a final image in which each neurons are labeled by rich and consistent colors throughout  
347 the image stack. (d) nTracer as an ImageJ plugin package allows user-guided tracing of neurons  
348 in distinct colors in densely labeled samples. (e) The tracing results are exportable in various  
349 formats for 3D line art rendering, single cell morphology and connectivity analysis.

350



351

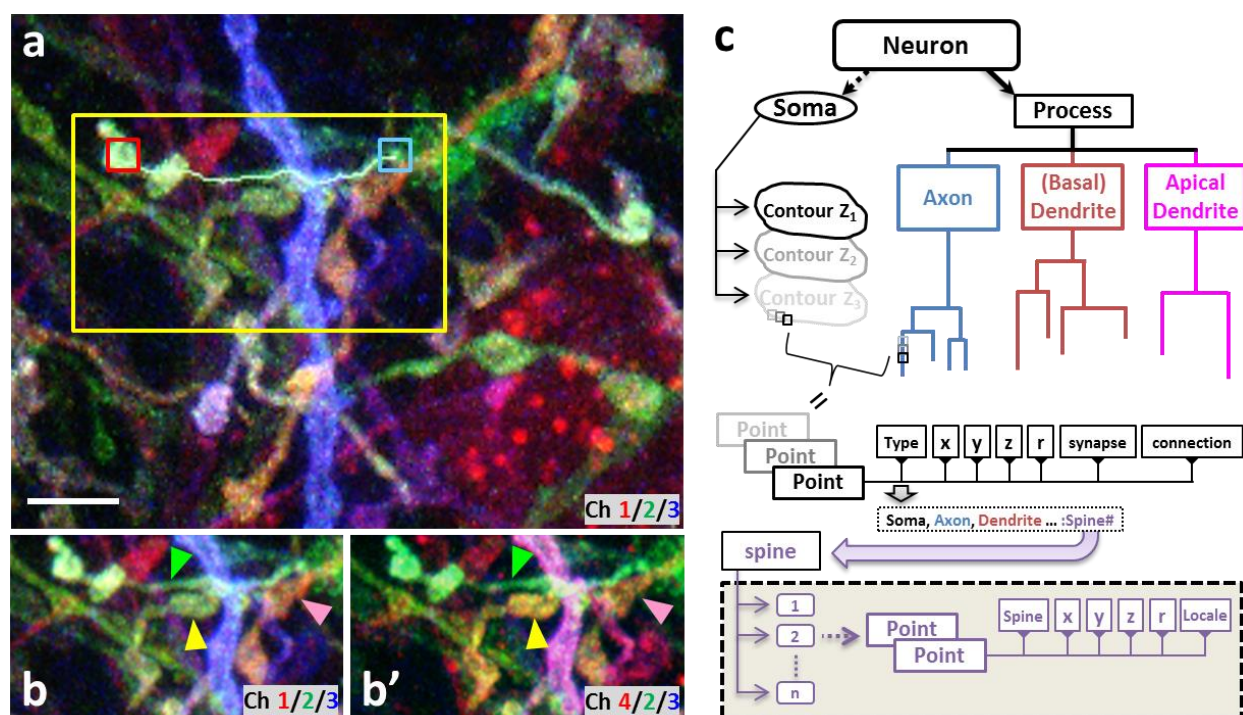

352

353

354 **Figure 2. nTracer basic functionality and data structure.**

355 (a) To start tracing, a mouse-click is placed in the vicinity of the neurite to be traced. nTracer  
 356 utilizes the color profile and a “mean-shift” algorithm to accurately reposition this mouse-input  
 357 onto the neurite as the start point (red box). The tracing end point (cyan box) is determined in the  
 358 same way with additional constrains to make sure that the end point has a similar color profile. A  
 359 keyboard hotkey is then used to trace as a neurite/spine in 3D. (b-b’) Two sets of RGB composite  
 360 images (best color separation for human tri-chromatic vision) can be toggled in nTracer to display  
 361 4 spectral channels taken from the 4-FP Brainbow AAV labeled samples. As not all the spectral  
 362 information is displayed at the same time, it is possible that neurites appearing the same color  
 363 actually belong to different neurons (compare green to yellow and yellow to pink arrowheads in b  
 364 and b’). Regardless of how the images are displayed, nTracer uses information from all four  
 365 channels to prevent tracing errors arising from human vision limitations. (c) Diagram of nTracer  
 366 results data structure as detailed in Methods. Scale bar is 5  $\mu$ m.

367



368  
369  
370

**Figure 3. Morphological analysis of single cells in densely labeled samples by nTracer.**

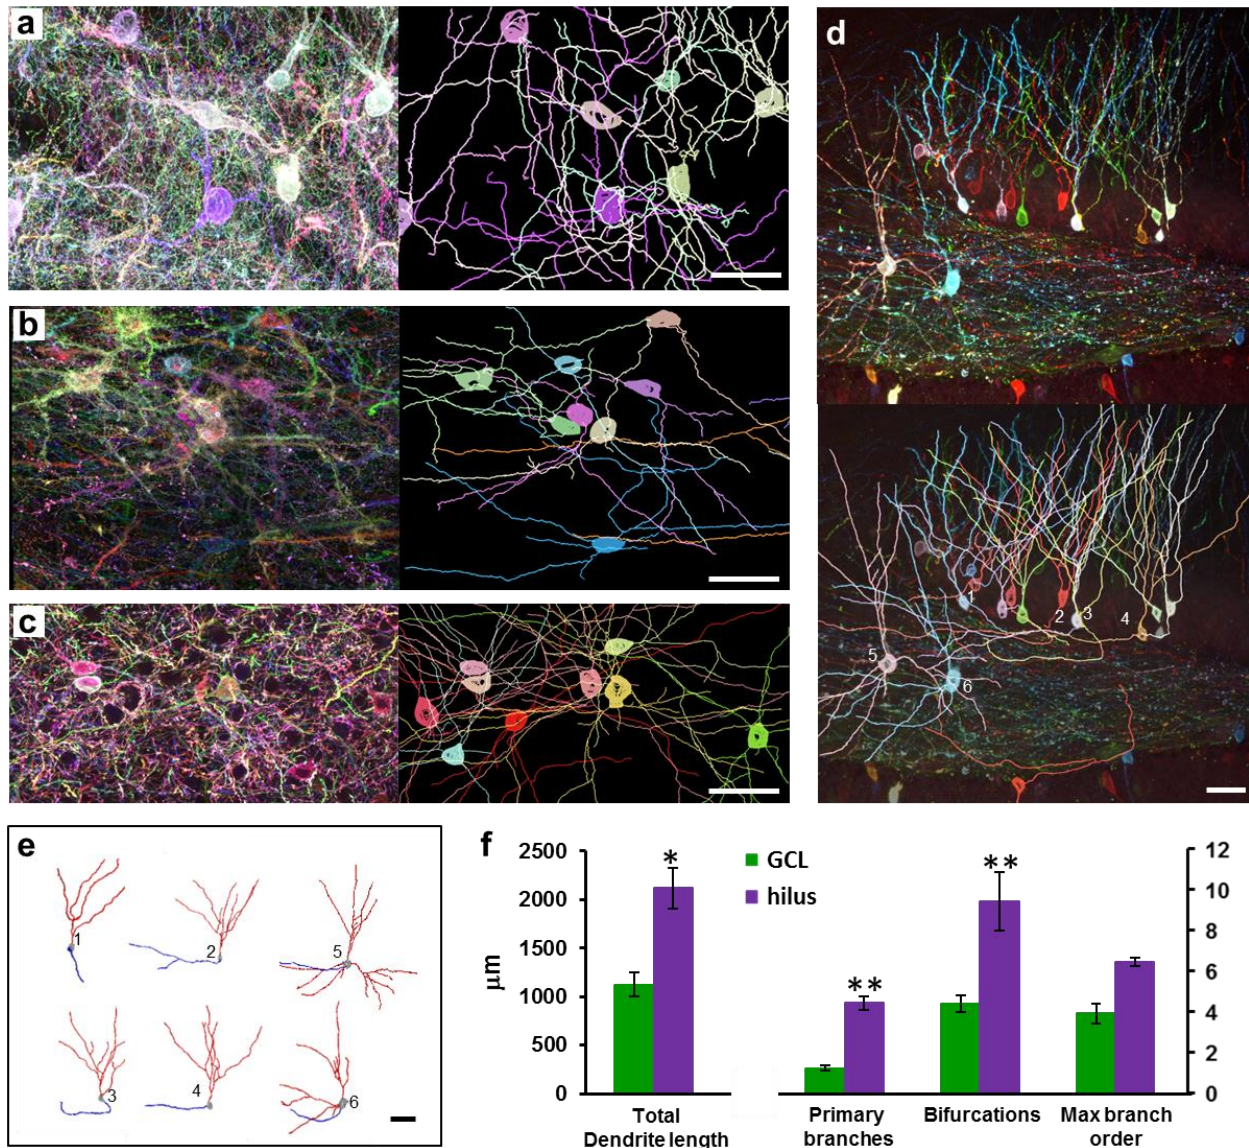

371  
372  
373

374 **Figure 3. Morphological analysis of single cells in densely labeled samples by nTracer.**

375 (a-d) Paired maximum z-projections from AAV.Brainbow-injected data sets and subsequent  
376 nTracer results shows the versatility of nTracer for studying diverse cell types in multiple brain  
377 regions. Representative reconstructions of (a) cholinergic cells from ChAT-Cre mouse injected in  
378 dorsolateral striatum, (b) POMC neurons from POMC-Cre mouse injected in arcuate nucleus of  
379 the hypothalamus, (c) basket cells from PV-Cre mouse injected in visual cortex, and (d) granule  
380 cells from POMC-Cre mouse injected in dentate gyrus. (e) Individual granule cells from (d) were  
381 exported from tracing results and displayed with color-coded compartments (red = dendrites, blue  
382 = axons). Here, cells 1-4 were localized in the granule cell layer (GCL) while cells 5-6 were  
383 localized in the hilus. (f) Granule cells localized in the hilus had longer total dendrite length, more  
384 primary branches and bifurcations than those localized in GCL; but they all had the same  
385 maximum branch order. Note that all granule cells used for analysis were taken from the same  
386 dentate gyrus section. All values displayed as mean  $\pm$  SEM. \*  $p < 0.05$ , \*\*  $p < 0.01$  by unpaired  
387 two-tailed Student's t-test. Detailed single-cell morphometric analyses of all of the cells in this  
388 figure can be found in Table 1. Scale bars are 50  $\mu\text{m}$ .

389

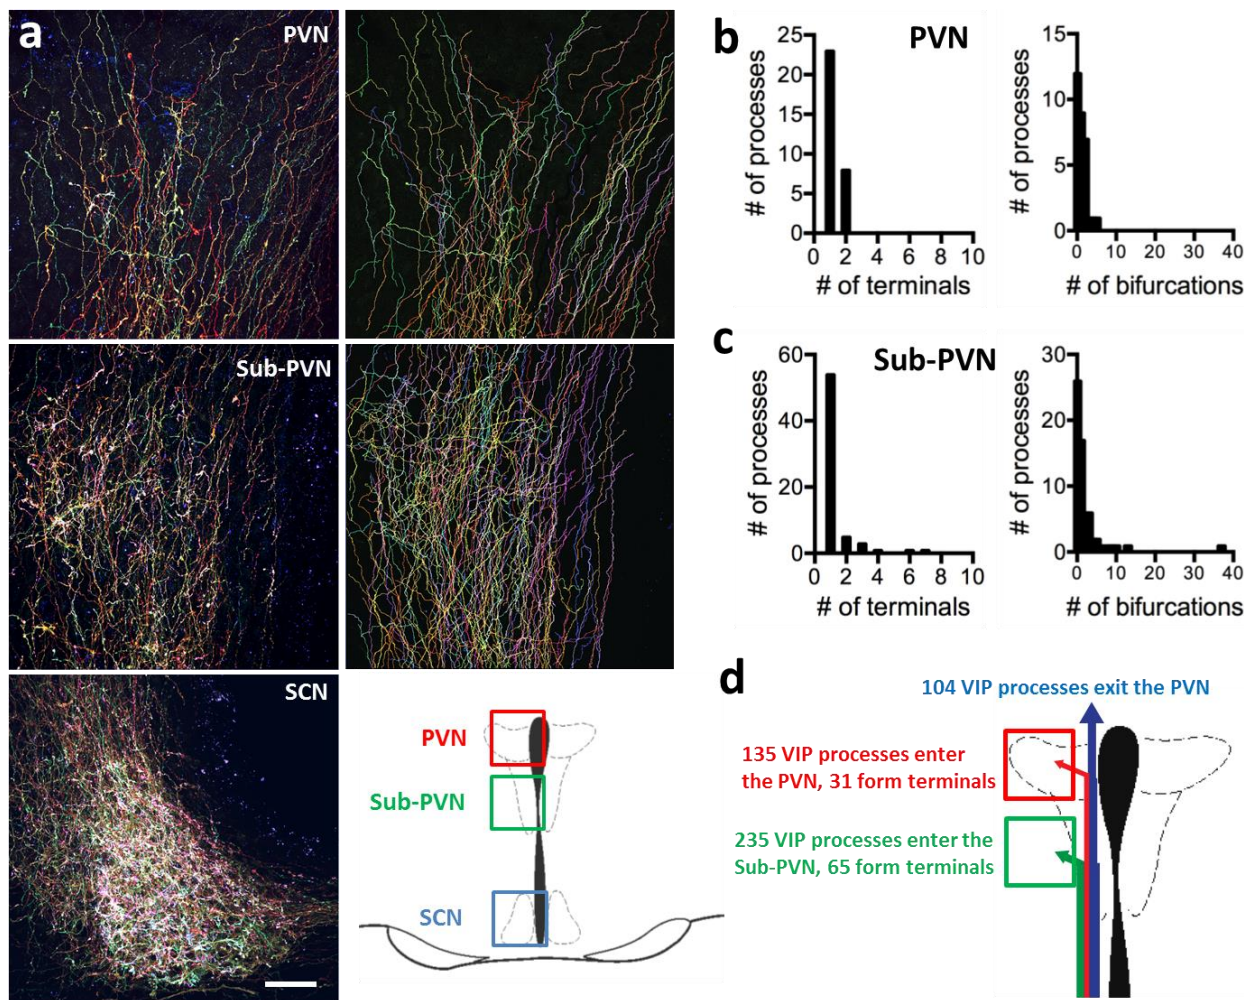

390

391

392 **Figure 4. Projection analysis of SCN VIP divergence in the sub-PVN and PVN.**

393 (a) Unilateral labeling of SCN VIP neurons using Brainbow AAVs reveals processes in the sub-  
 394 PVN and PVN (left panels). Using nTracer (right panels), more than 200 processes can be mapped  
 395 from a single neuronal population in one brain section. Anatomical characteristics of these  
 396 processes can be quantified: (b and c) show the number of terminal synapses (left panels) and  
 397 bifurcations per process (right panels) of VIP processes entering PVN and sub-PVN, respectively.  
 398 (d) A schematic details the number of VIP processes identified in the sub-PVN and PVN and the  
 399 fraction that form terminals. Scale bar is 50  $\mu$ m.

400



401 **Table 1. Single cell morphometric analysis of dendritic trees.**

| Neuron subtype: <i>region</i>           | (n) | Primary branches | Bifurcations   | Max. branch order | Dendritic tree length (μm) |
|-----------------------------------------|-----|------------------|----------------|-------------------|----------------------------|
| <b>ChAT-Cre:</b> <i>CPu</i>             | 13  | 3.62 +/- 0.39    | 18.0 +/- 4.71  | 9.23 +/- 2.16     | 3320.7 +/- 427.4           |
| <b>PV-Cre:</b> <i>VI</i>                | 9   | 6.67 +/- 0.50    | 9.2 +/- 3.15   | 3.78 +/- 1.01     | 1269.9 +/- 175.0           |
| <b>POMC-Cre:</b> <i>Arc</i>             | 11  | 2.91 +/- 0.30    | 4.3 +/- 1.74   | 2.91 +/- 1.13     | 610.5 +/- 89.1             |
| <b>POMC-Cre:</b> <i>DG</i><br>(normal)  | 13  | 1.31 +/- 0.28    | 4.5 +/- 0.9    | 4.00 +/- 1.03     | 1123.8 +/- 267.2           |
| <b>POMC-Cre:</b> <i>DG</i><br>(ectopic) | 2   | 4.50 +/- 4.49*   | 9.5 +/- 18.3** | 6.50 +/- 2.59     | 2121.7 +/- 461.3***        |

402

403 Morphological descriptors averaged from multiple cells in a single Brainbow-labeled tissue  
404 section. Rows are organized based on the Cre mouse line used for labeling (bold) and the brain  
405 region injected with Brainbow AAV (italics). All values were obtained by exporting individual  
406 cell traces from nTracer as SWC files and importing them into L-measure. n = number of neurons.  
407 Primary branches is a count of dendritic processes directly connected to the soma. Bifurcations is  
408 a count of the total dendritic branch points. Maximum branch order is a measure of branch order  
409 with respect to the soma and is recorded only once per neuron. Dendritic tree length is given in  
410 micrometers and is a sum of all dendritic processes per neuron. All values reported as mean +/-  
411 95% C.I. \*  $p = 1.31 \times 10^{-6}$ , \*\*  $p = 0.002$ , \*\*\* $p = 0.03$  by unpaired two-tailed t-test (POMC-Cre  
412 normal vs. ectopic).

413

414 **Reference**

- 415 1. Hildebrand, D. G. C. *et al.* Whole-brain serial-section electron microscopy in larval  
416 zebrafish. *Nature* **545**, 345–349 (2017).
- 417 2. Chothani, P., Mehta, V. & Stepanyants, A. Automated tracing of neurites from light  
418 microscopy stacks of images. *Neuroinformatics* **9**, 263–78 (2011).
- 419 3. Osten, P. & Margrie, T. W. Mapping brain circuitry with a light microscope. *Nature*  
420 *Methods* **10**, 515–523 (2013).
- 421 4. Meijering, E. Neuron tracing in perspective. *Cytom. Part A* **77**, 693–704 (2010).
- 422 5. Peng, H. *et al.* BigNeuron: Large-Scale 3D Neuron Reconstruction from Optical  
423 Microscopy Images. *Neuron* **87**, 252–256 (2015).
- 424 6. Parekh, R. & Ascoli, G. A. Neuronal morphology goes digital: a research hub for cellular  
425 and system neuroscience. *Neuron* **77**, 1017–38 (2013).
- 426 7. Lu, J. Neuronal tracing for connectomic studies. *Neuroinformatics* **9**, 159–166 (2011).
- 427 8. Livet, J. *et al.* Transgenic strategies for combinatorial expression of fluorescent proteins in  
428 the nervous system. *Nature* **450**, 56–62 (2007).
- 429 9. Cai, D., Cohen, K. B., Luo, T., Lichtman, J. W. & Sanes, J. R. Improved tools for the  
430 Brainbow toolbox. *Nat. Methods* **10**, 540–7 (2013).
- 431 10. Cetin, A., Komai, S., Eliava, M., Seeburg, P. H. & Osten, P. Stereotaxic gene delivery in  
432 the rodent brain. *Nat. Protoc.* **1**, 3166–3173 (2006).
- 433 11. Ke, M.-T., Fujimoto, S. & Imai, T. SeeDB: a simple and morphology-preserving optical  
434 clearing agent for neuronal circuit reconstruction. *Nat. Neurosci.* **16**, 1154–61 (2013).
- 435 12. Zimmermann, T. Spectral imaging and linear unmixing in light microscopy. *Adv.*  
436 *Biochem. Eng. Biotechnol.* **95**, 245–65 (2005).
- 437 13. Vonesch, C. & Unser, M. A Fast Thresholded Landweber Algorithm for Wavelet-  
438 Regularized Multidimensional Deconvolution. *IEEE Trans. Image Process.* **17**, 539–549

- 439 (2008).
- 440 14. Abramoff, M. D., Magalhães, P. J. & Ram, S. J. Image processing with ImageJ.  
441 *Biophotonics Int.* **11**, 36–42 (2004).
- 442 15. Yizong Cheng, Y. Mean shift, mode seeking, and clustering. *IEEE Trans. Pattern Anal.*  
443 *Mach. Intell.* **17**, 790–799 (1995).
- 444 16. Hart, P., Nilsson, N. & Raphael, B. A Formal Basis for the Heuristic Determination of  
445 Minimum Cost Paths. *IEEE Trans. Syst. Sci. Cybern.* **4**, 100–107 (1968).
- 446 17. Longair, M. H., Baker, D. a. & Armstrong, J. D. Simple neurite tracer: Open source  
447 software for reconstruction, visualization and analysis of neuronal processes.  
448 *Bioinformatics* **27**, 2453–4 (2011).
- 449 18. Cannon, R. C., Turner, D. a., Pyapali, G. K. & Wheal, H. V. An on-line archive of  
450 reconstructed hippocampal neurons. *J. Neurosci. Methods* **84**, 49–54 (1998).
- 451 19. Scorcioni, R., Polavaram, S. & Ascoli, G. A. L-Measure: a web-accessible tool for the  
452 analysis, comparison and search of digital reconstructions of neuronal morphologies. *Nat.*  
453 *Protoc.* **3**, 866–76 (2008).
- 454 20. Teclemariam-Mesbah, R., Kalsbeek, A., Pevet, P. & Buijs, R. M. Direct vasoactive  
455 intestinal polypeptide-containing projection from the suprachiasmatic nucleus to spinal  
456 projecting hypothalamic paraventricular neurons. *Brain Res.* **748**, 71–6 (1997).
- 457 21. Taniguchi, H. *et al.* A resource of Cre driver lines for genetic targeting of GABAergic  
458 neurons in cerebral cortex. *Neuron* **71**, 995–1013 (2011).
- 459 22. Liu, Y. The DIADEM and beyond. *Neuroinformatics* **9**, 99–102 (2011).
- 460 23. Peng, H., Long, F., Zhao, T. & Myers, E. Proof-editing is the bottleneck of 3D neuron  
461 reconstruction: the problem and solutions. *Neuroinformatics* **9**, 103–5 (2011).
- 462 24. Chen, F. *et al.* Optical imaging. Expansion microscopy. *Science* **347**, 543–8 (2015).
- 463 25. Chozinski, T. J. *et al.* Expansion microscopy with conventional antibodies and fluorescent

- 464 proteins. *Nat. Methods* **13**, 485–8 (2016).
- 465 26. Tillberg, P. W. *et al.* Protein-retention expansion microscopy of cells and tissues labeled  
466 using standard fluorescent proteins and antibodies. *Nat. Biotechnol.* (2016).  
467 doi:10.1038/nbt.3625
- 468 27. Sümbül, U. *et al.* Automated scalable segmentation of neurons from multispectral images.  
469 in *30th Conference on Neural Information Processing Systems (NIPS)* (2016).
- 470 28. Schindelin, J., Rueden, C. T., Hiner, M. C. & Eliceiri, K. W. The ImageJ ecosystem: An  
471 open platform for biomedical image analysis. *Mol. Reprod. Dev.* **82**, 518–29
